# Supplementary material for: Naked-eye fingerprinting of single nucleotide polymorphisms on psoriasis patients
Source: Royal Society of Chemistry journal article supplement (doi:10.1039/c6nr02200f), 2016-01-01
Supplement: c6nr02200f1.pdf [file c6nr02200f1.pdf]

## Supporting Information

### **Naked-Eye Fingerprinting of Single Nucleotide Polymorphisms on Psoriasis Patients**

Paola Valentini<sup>1†</sup>, Alessandra Marsella<sup>1,2†</sup>, Paolo Tarantino<sup>3</sup>, Salvatore Mauro<sup>3</sup>, **Silvia Baglietto<sup>4</sup>**,  
Maurizio Congedo<sup>5</sup>, and Pier Paolo Pompa<sup>1\*</sup>

<sup>1</sup> *Nanobiointeractions&Nanodiagnostics, Istituto Italiano di Tecnologia (IIT), Via Morego, 30 – 16163 – Genova (Italy).*

<sup>2</sup> *Department of Engineering for Innovation, University of Salento, Via per Monteroni – 73100 – Lecce (Italy).*

<sup>3</sup> *Laboratory of Medical Genetics, Vito Fazzi Hospital, Piazzetta Muratore – 73100 – Lecce (Italy).*

<sup>4</sup> *Pattern Analysis and Computer Vision (PAVIS), Istituto Italiano di Tecnologia (IIT), Via Morego, 30 – 16163 – Genova (Italy).*

<sup>5</sup> *Department of Dermatology, Vito Fazzi Hospital, Piazzetta Muratore – 73100 – Lecce (Italy).*

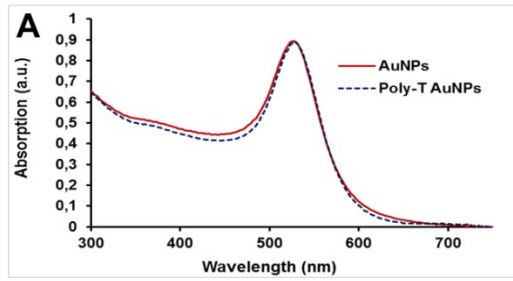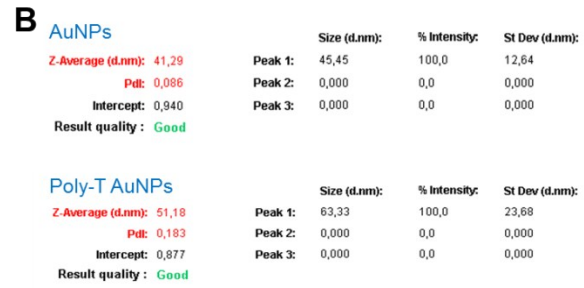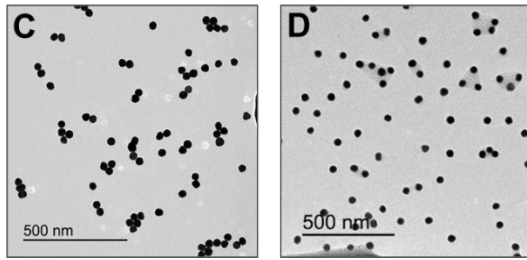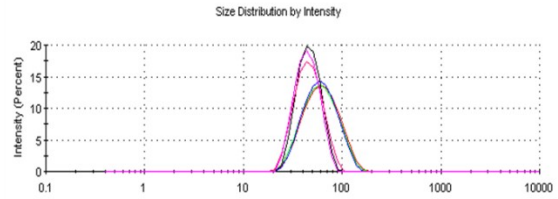

**Fig. S1.** Characterization of AuNPs and PolyT-AuNPs. (A) UV-vis spectra; (B) DLS data; (C,D) TEM images of AuNPs (C) and PolyT-AuNPs (D).

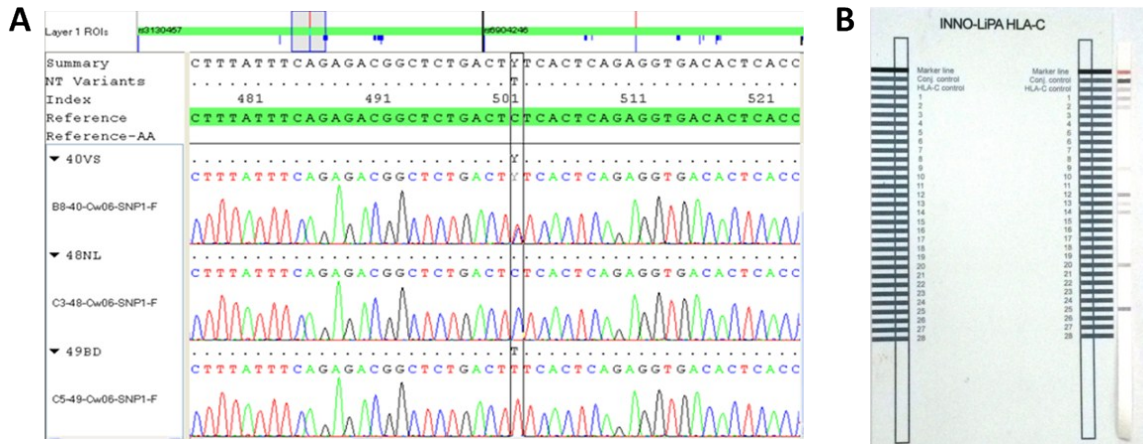

**Fig. S2.** Standard reference tests for HLA genotyping. **(A)** Sequencing analysis of SNPs. Each row corresponds to a different patient; the reference sequence (green) and the nucleotide variant (column selector) are indicated. The three genotypes (heterozygous, wild-type and mutant) are clearly distinct. **(B)** Representative image of a INNO-LiPA® HLA-C line probe assay, showing the molecular typing of human leukocyte antigen (HLA) C alleles at allele group level Cw\*01 – Cw\*18. Typing and interpretation of results was performed by LiRAS software.

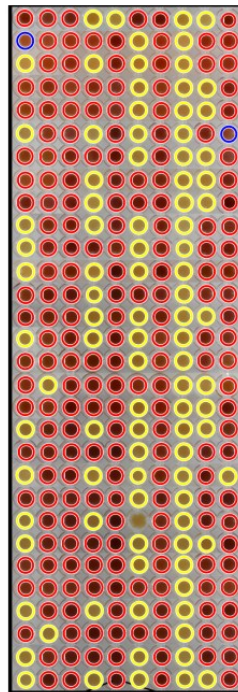

**Fig. S3.** Automatic color analysis of the results. A picture was analyzed by the Circular Hough Transform and by a K-means clustering algorithm, as described in Methods. The final result is a label of yellow and red circles. Unclear data are marked in blue to highlight the need for visual verification. In this picture, 298 samples out of 300 were correctly assigned by the automated analysis. The remaining 2 unclear results (<0.7 %) could be easily confirmed manually.

| PCR primers           |                                                            |                                                             |                             |       |       |       |
|-----------------------|------------------------------------------------------------|-------------------------------------------------------------|-----------------------------|-------|-------|-------|
|                       | Sequence (5'->3')                                          | Length                                                      | Tmelting (°C)               | GC%   |       |       |
| HLA C*06:02           | rs3130457                                                  | CCATCTACCACGCTGCTGTA                                        | 20                          | 59.54 | 55.00 |       |
|                       |                                                            | Biot - GAGGGATGCACAGCCATAGA                                 | 20                          | 59.24 | 55.00 |       |
|                       | rs6904246                                                  | CCTCACCAGGAACTGAATCT                                        | 20                          | 56.54 | 50.00 |       |
|                       |                                                            | Biot - ACACCACAGATGGATTGGTT                                 | 20                          | 57.02 | 45.00 |       |
|                       | rs7745906                                                  | TGGAAAGATCCCATTCAAAG                                        | 21                          | 54.03 | 38.10 |       |
|                       |                                                            | Biot - GTTTTTTGTGGGGTTCAGAT                                 | 20                          | 54.26 | 40.00 |       |
|                       | rs10484554                                                 | CGGGAGTCCAGCAGGTC                                           | 17                          | 59.02 | 70.59 |       |
|                       |                                                            | Biot- TGCAGCAAAGCCTGGGA                                     | 17                          | 59.07 | 58.82 |       |
|                       | TNFAIP3                                                    | rs610604                                                    | GGCAAGAATTGTAGAACCATT       | 21    | 54.43 | 38.10 |
|                       |                                                            |                                                             | Biot - TCATTCTTGACTCGAACATG | 20    | 53.38 | 40.00 |
| Discriminating probes |                                                            |                                                             |                             |       |       |       |
| HLA C*06:02           | rs3130457                                                  | 5'GACT T TCACTCAGAG GT AAAAAAAAAA AAAAAAAAAA AAAAAAAAAA 3'  |                             |       |       |       |
|                       |                                                            | 5'GACT C TCACTCAGAG GT AAAAAAAAAA AAAAAAAAAA AAAAAAAAAA 3'  |                             |       |       |       |
|                       | rs6904246                                                  | 5'CCAG G GTCCAGAATTG AAAAAAAAAA AAAAAAAAAA AAAAAAAAAA 3'    |                             |       |       |       |
|                       |                                                            | 5'CCAG A GTCCAGAATTG AAAAAAAAAA AAAAAAAAAA AAAAAAAAAA 3'    |                             |       |       |       |
|                       | rs7745906                                                  | 5'CAGT G GTAGATTTTCTTAC AAAAAAAAAA AAAAAAAAAA AAAAAAAAAA 3' |                             |       |       |       |
|                       |                                                            | 5'CAGT A GTAGATTTTCTTAC AAAAAAAAAA AAAAAAAAAA AAAAAAAAAA 3' |                             |       |       |       |
|                       | rs10484554                                                 | 5'TCAC T TATGACGTCTCAG AAAAAAAAAA AAAAAAAAAA AAAAAAAAAA 3'  |                             |       |       |       |
|                       |                                                            | 5'TCAC C TATGACGTCTCAG AAAAAAAAAA AAAAAAAAAA AAAAAAAAAA 3'  |                             |       |       |       |
| TNFAIP3               | rs610604                                                   | 5'AGCT C ACACTTTTCA CG AAAAAAAAAA AAAAAAAAAA AAAAAAAAAA 3'  |                             |       |       |       |
|                       | 5'AGCT A ACACTTTTCA CG AAAAAAAAAA AAAAAAAAAA AAAAAAAAAA 3' |                                                             |                             |       |       |       |

**Table S1.** Sequences of primers and discriminating probes used for the colorimetric test.

**PCR primers**

|                    | Sequence (5'→3')                      | Length | Tmelting (°C) | GC%   |
|--------------------|---------------------------------------|--------|---------------|-------|
| <b>HLA C*06:02</b> | <b>rs3130457</b> TCCTCCCCTTCTCCAAACAC | 20     | 58,94         | 55    |
|                    | GTTTCGCCTCATCGTGGTTT                  | 20     | 59,13         | 50    |
|                    | <b>rs6904246</b> AAGAGGTTGAGAGGTTGGGG | 20     | 58,93         | 55    |
|                    | TCAGGGAGCAGGTGTTAGTC                  | 20     | 58,73         | 55    |
|                    | <b>rs7745906</b> AACATGTCACAGTGCTGCAG | 20     | 59,05         | 50    |
|                    | GCGGCAACAGAGTGAGAAC                   | 19     | 59,14         | 57,89 |
| <b>rs10484554</b>  | CCTTGATTCAGTTTGGGGCC                  | 20     | 59,1          | 55    |
|                    | ACTCTGTCCCTGTTCTTCT                   | 20     | 57,59         | 50    |
| <b>TNFAIP3</b>     | <b>rs610604</b> AGCAAAATACCCAACCTGAGG | 21     | 58,19         | 47,62 |
|                    | AGGTTCCATGGGATTCTGGG                  | 20     | 59,07         | 55    |

**Table S2.** Primers used for the automated direct sequencing.

| PATIENT | HLA-C allele      |            |                   |            |                   |            |                   |            | TNFAIP3 gene    |                  |                    |                   |            |  |
|---------|-------------------|------------|-------------------|------------|-------------------|------------|-------------------|------------|-----------------|------------------|--------------------|-------------------|------------|--|
|         | rs10484554        |            | rs3130457         |            | rs6904246         |            | rs7745906         |            | Genotype        | RDB <sup>a</sup> | LiRaS <sup>b</sup> | rs610604          |            |  |
|         | COLORIMETRIC TEST | SEQUENCING |                 |                  |                    | COLORIMETRIC TEST | SEQUENCING |  |
| 1       | C/T               | C/T        | T/T               | T/T        | A/A               | A/A        | G/G               | G/G        | NN <sup>c</sup> | 12/12            | 1202/1214          | T/T               | T/T        |  |
| 2       | C/T               | C/T        | C/T               | C/T        | G/G               | G/G        | G/G               | G/G        | NP <sup>d</sup> | 04/06            | 0404/0602          | G/T               | G/T        |  |
| 3       | C/C               | C/C        | T/T               | T/T        | G/G               | G/G        | G/G               | G/G        | NN              | 14/16            | 1402/1404          | G/T               | G/T        |  |
| 4       | C/T               | C/T        | C/T               | C/T        | G/G               | G/G        | G/G               | G/G        | NP              | 01/06            | 0102/0602          | T/T               | T/T        |  |
| 5       | C/T               | C/T        | C/T               | C/T        | G/G               | G/G        | G/G               | G/G        | NP              | 04/06            | 0401/0602          | T/T               | T/T        |  |
| 6       | C/C               | C/C        | T/T               | T/T        | G/G               | G/G        | G/G               | G/G        | NN              | 04/04            | 0401/0401          | G/T               | G/T        |  |
| 7       | C/T               | C/T        | C/T               | C/T        | G/G               | G/G        | G/G               | G/G        | NP              | 06/15            | 0602/1502          | T/T               | T/T        |  |
| 8       | C/T               | C/T        | T/T               | T/T        | A/G               | A/G        | G/G               | G/G        | NN              | 04/06            | 0411/0611          | T/T               | T/T        |  |
| 9       | C/T               | C/T        | T/T               | T/T        | A/G               | A/G        | G/G               | G/G        | NN              | 08/12            | 0805/0812          | T/T               | T/T        |  |
| 10      | C/C               | C/C        | T/T               | T/T        | G/G               | G/G        | G/G               | G/G        | NN              | 02/07            | 0202/0208          | G/T               | G/T        |  |
| 11      | C/C               | C/C        | C/T               | C/T        | G/G               | G/G        | G/G               | G/G        | NN              | 07/07            | 0701/0706          | G/T               | G/T        |  |
| 12      | C/C               | C/C        | T/T               | T/T        | G/G               | G/G        | G/G               | G/G        | NN              | 04/15            | 0401/1501          | G/T               | G/T        |  |
| 13      | C/T               | C/T        | T/T               | T/T        | A/G               | A/G        | G/G               | G/G        | NN              | 04/12            | 0407/1202          | G/T               | G/T        |  |
| 14      | C/T               | C/T        | T/T               | T/T        | G/G               | G/G        | G/G               | G/G        | NP              | 06/17            | 0602/1701          | T/T               | T/T        |  |
| 15      | C/C               | C/C        | T/T               | T/T        | G/G               | G/G        | G/G               | G/G        | NN              | 07/16            | 0701/1601          | G/T               | G/T        |  |
| 16      | C/T               | C/T        | C/T               | C/T        | G/G               | G/G        | G/G               | G/G        | NP              | 04/06            | 0401/0602          | G/T               | G/T        |  |
| 17      | T/T               | T/T        | C/T               | C/T        | A/G               | A/G        | G/G               | G/G        | NP              | 06/12            | 0602/1202          | T/T               | T/T        |  |
| 18      | C/T               | C/T        | C/T               | C/T        | G/G               | G/G        | G/G               | G/G        | NP              | 01/06            | 0102/0602          | T/T               | T/T        |  |
| 19      | C/C               | C/C        | T/T               | T/T        | G/G               | G/G        | G/G               | G/G        | NN              | 04/07            | 0401/0701          | T/T               | T/T        |  |
| 20      | C/T               | C/T        | C/T               | C/T        | G/G               | G/G        | G/G               | G/G        | NP              | 04/06            | 0401/0602          | G/T               | G/T        |  |
| 21      | C/C               | C/C        | T/T               | T/T        | G/G               | G/G        | G/G               | G/G        | NN              | 04/15            | 0401/1511          | G/G               | G/G        |  |
| 22      | C/T               | C/T        | C/T               | C/T        | G/G               | G/G        | G/G               | G/G        | NP              | 04/06            | 0401/0602          | G/T               | G/T        |  |
| 23      | C/C               | C/C        | T/T               | T/T        | G/G               | G/G        | G/G               | G/G        | NN              | 05/15            | 0501/1507          | G/T               | G/T        |  |
| 24      | C/C               | C/C        | C/T               | C/T        | G/G               | G/G        | G/G               | G/G        | NN              | 07/08            | 0706/0801          | T/T               | T/T        |  |
| 25      | C/T               | C/T        | C/T               | C/T        | G/G               | G/G        | G/G               | G/G        | NP              | 01/06            | 0102/0602          | G/T               | G/T        |  |
| 26      | C/T               | C/T        | C/T               | C/T        | A/G               | A/G        | G/G               | G/G        | NN              | 08/14            | 0803/1404          | G/T               | G/T        |  |
| 27      | C/C               | C/C        | T/T               | T/T        | G/G               | G/G        | G/G               | G/G        | NN              | 04/16            | 0407/1601          | G/T               | G/T        |  |
| 28      | T/T               | T/T        | C/T               | C/T        | A/G               | A/G        | G/G               | G/G        | NP              | 06/12            | 0602/1202          | G/T               | G/T        |  |
| 29      | C/C               | C/C        | C/T               | C/T        | G/G               | G/G        | G/G               | G/G        | NN              | 08/15            | 0801/1509          | G/T               | G/T        |  |
| 30      | C/C               | C/C        | T/T               | T/T        | G/G               | G/G        | G/G               | G/G        | NN              | 05/05            | 0501/0501          | T/T               | T/T        |  |

<sup>a</sup>RDB = Reverse Dot Blot C\* test results for both allele (two digits)  
<sup>b</sup>LiRaS = prediction of C\* status from RDB results using the LiRaS software (four digits)  
<sup>c</sup>NN = Negative for C\*06:02 on both chromosomes  
<sup>d</sup>NP = Heterozygote for C\*06:02

**Table S3.** Detailed results of the SNPs genotypization by colorimetric test, sequencing, and reverse dot blot test, for each patient.
